# Supplementary material for: Vegetation influences soil properties along riparian zones of the Beijiang River in Southern China
Source: PeerJ journal article supplement (doi:10.7717/peerj.9699), 2020-08-13
Supplement: peerj-43996-Table_S1.docx [file peerj-43996-Table_S1.docx]

Table S1 Sampling site along the Beijiang River

| Sampling ID | Location | | Altitude (m) | Distance to river (m) | Vegetation type |
| --- | --- | --- | --- | --- | --- |
| Longitude (E) | Latitude (N) |
| S1 | 112.8774 | 23.4598 | 70 | 151 | Mixed forest |
| S2 | 112.9047 | 23.4827 | 73 | 68 | Grassland |
| S3 | 112.9608 | 23.5559 | 67 | 375 | Grassland |
| S4 | 112.9609 | 23.5932 | 63 | 411 | Eucalyptus forest |
| S5 | 113.1083 | 23.6934 | 72 | 210 | Eucalyptus forest |
| S6 | 113.0930 | 23.7000 | 92 | 444 | Bamboo forest |
| S7 | 113.2259 | 23.7755 | 74 | 45 | Grassland |
| S8 | 113.2256 | 23.7754 | 74 | 29 | Grassland |
| S9 | 113.2637 | 23.9238 | 107 | 96 | Eucalyptus forest |
| S10 | 113.2604 | 23.9225 | 91 | 20 | Bamboo forest |
| S11 | 113.2976 | 24.0329 | 84 | 373 | Bamboo forest |
| S12 | 113.3080 | 24.0472 | 87 | 163 | Bamboo forest |
| S13 | 113.3643 | 24.0735 | 106 | 160 | Eucalyptus forest |
| S14 | 113.4323 | 24.2002 | 88 | 97 | Mixed forest |
| S15 | 113.4259 | 24.2046 | 89 | 671 | Grassland |
| S16 | 113.5082 | 24.4168 | 108 | 336 | Mixed forest |
| S17 | 113.5149 | 24.4203 | 105 | 57 | Mixed forest |
| S18 | 113.5697 | 24.5815 | 104 | 331 | Bamboo forest |
| S19 | 113.5571 | 24.5835 | 116 | 288 | Eucalyptus forest |
| S20 | 113.7544 | 25.9254 | 134 | 704 | Mixed forest |
| S21 | 113.7596 | 24.9259 | 128 | 220 | Mixed forest |
| S22 | 113.8249 | 24.9819 | 138 | 70 | Bamboo forest |
| S23 | 113.8243 | 24.9820 | 158 | 60 | Grassland |
| S24 | 113.5225 | 24.8241 | 145 | 1434 | Mixed forest |
| S25 | 113.5225 | 24.8947 | 115 | 437 | Mixed forest |
| S26 | 113.4205 | 24.9514 | 138 | 24 | Bamboo forest |
