# Supplementary material for: Vegetation influences soil properties along riparian zones of the Beijiang River in Southern China
Source: PeerJ journal article supplement (doi:10.7717/peerj.9699), 2020-08-13
Supplement: peerj-43996-Table_S2.docx [file peerj-43996-Table_S2.docx]

Table S2 Dominant species under different vegetation types.

| Vegetation type | Dominant species |
| --- | --- |
| Eucalyptus forest | *Eucalyptus urophylla S.T. Blake, Alocasia macrorrhiza (L.) Schott, Cyclosorus parasiticus (L.) Farwell., Alternanthera Philoxeroides（Mart.）Griseb., Mimosa sepiaria Benth., Paspalum conjugatum Berg.* |
| Bamboo forest | *Sinocalamus beecheyanus (Munro) Mcclure, Microstegium vagans (Nees ex Steud.) A. Camus, Alocasia macrorrhiza (L.) Schott, Polygonum chinense L., Cyclosorus parasiticus (L.) Farwell.* |
| Mixed forest | *Mimosa sepiaria Benth., Vitex negundo L., Cinnamomum burmanni (Nees et T.Nees) Blume, Morus alba L., Microstegium vagans (Nees ex Steud.) A. Camus, Sinocalamus beecheyanus (Munro) Mcclure* |
| Grassland | *Cynodondactylon(L.) Pers., Paspalum conjugatum Berg., Xanthium sibiricum Patrin ex Widder, Phyllanthus cochinchinensis Spr., Praxelis clematidea(Griseb.) R. M. King et H. Rob., Alternanthera Philoxeroides（Mart.）Griseb., Conyza bonariensis (L.) Cronq.* |
