# Supplementary material for: Vegetation influences soil properties along riparian zones of the Beijiang River in Southern China
Source: PeerJ journal article supplement (doi:10.7717/peerj.9699), 2020-08-13
Supplement: Supplemental_File.xls [file Supplemental_File.xls]

## Sheet: Fig.2
		Eucalyptus forest				Bamboo forest				Mixed forest				Grassland
	sand	silt	clay		sand	silt	clay		sand	silt	clay		sand	silt	clay
	26.4	48	25.6		47.74	35	17.26		38.4	36	25.6		34.74	46	19.26
	21.74	52	26.26		56.4	28	15.6		23.6	49.2	27.2		27.74	52	20.26
	36.4	46	17.6		55.6	25.2	19.2		67.6	17.2	15.2		11.6	55.2	33.2
	19.6	53.2	27.2		56.6	22.2	21.2		15.6	53.2	31.2		67.6	16.2	16.2
	24.6	42.2	33.2		29.6	47.2	23.2		29.6	49.2	21.2		18.4	54	27.6
					58.6	24.2	17.2		32.6	49.2	18.2		28.4	44	27.6
					32.94	47.2	19.86		59.6	25.2	15.2
									29.6	40.2	30.2

## Sheet: Fig.3
		SOC (g/kg)					TN (g/kg)					NH4+-N (g/kg)					NO3--N (g/kg)					TP (g/kg)					AP (g/kg)
	Eucalyptus forest	Bamboo forest	Mixed forest	Grassland		Eucalyptus forest	Bamboo forest	Mixed forest	Grassland		Eucalyptus forest	Bamboo forest	Mixed forest	Grassland		Eucalyptus forest	Bamboo forest	Mixed forest	Grassland		Eucalyptus forest	Bamboo forest	Mixed forest	Grassland		Eucalyptus forest	Bamboo forest	Mixed forest	Grassland
	15.6	16.3	13.9	11.6		1.25	1.26	1.22	0.995		0.0139	0.0131	0.0293	0.0105		0.00914	0.0187	0.00446	0.00359		0.743	0.545	0.484	0.415		0.0151	0.0037	0.0038	0.0061
	17.2	16.5	10.8	14.9		1.65	1.38	0.883	1.27		0.0135	0.0111	0.008	0.0154		0.00574	0.00963	0.0081	0.0152		0.564	0.358	0.347	0.568		0.0081	0.0031	0.0077	0.0082
	7.08	19.4	17.2	16.6		0.755	1.54	1.54	1.4		0.016	0.0121	0.0164	0.012		0.00477	0.00588	0.00429	0.00553		0.476	0.354	0.644	0.591		0.0246	0.003	0.0121	0.0049
	18.1	15.9	17.1	14.4		1.57	1.23	1.67	1.35		0.0118	0.0219	0.0103	0.015		0.00772	0.0101	0.00536	0.00467		0.652	0.293	0.748	0.553		0.0086	0.0031	0.0078	0.008
	3.49	16.5	17.1	14.9		0.366	1.23	1.43	1.28		0.0158	0.0092	0.0178	0.0091		0.00158	0.00761	0.00869	0.00751		0.812	0.476	0.655	0.621		0.0043	0.0074	0.0095	0.0101
		11.6	29.8	10.2			0.938	2.45	0.844			0.0127	0.014	0.0074			0.00782	0.0265	0.00394			0.4	0.781	0.354			0.0152	0.0289	0.0083
		13.8	12				1.138	1.12				0.0113	0.0308				0.00897	0.0154				0.263	0.392				0.0072	0.0262
			23.6					2.09					0.0076					0.0107					0.316					0.0257

## Sheet: Fig.4
Samples	disriver	type	SOC(g/kg)	TN(g/kg)	NH4-N(g/kg)	NO3-N(g/kg)	TP(g/kg)	AP(g/kg)	Treeheight	Treecover	Shrubheight	Shrubcover	Herbheight	Herbcover	Elevation
BLK	1	1	18.1	1.57	0.0118	0.00772	0.652	0.00864	20	0.65	0	0	30	0.95	106
LX-1	1	1	7.075	0.755	0.016	0.00477	0.476	0.0246	15	0.7	1.5	0.7	100	0.4	107
LX-2	1	2	16.45	1.38	0.0111	0.00963	0.358	0.00307	11	0.8	1.2	0	30	0.25	91
GT	1	2	13.8	1.138	0.0113	0.00897	0.263	0.00723	12	0.8	0	0.002	15	0.3	138
SK-2	1	2	29.8	2.45	0.014	0.0265	0.781	0.0289	11	0.85	2	0.02	15	0.3	105
ZT-1	1	2	11.6	0.938	0.0127	0.00782	0.4	0.0152	12	0.85	0	0	15	0.3	138
DT-1	1	2	17.1	1.67	0.0103	0.00536	0.748	0.00779	0	0	6	0.7	50	0.15	70
LJK-2	1	2	15.9	1.23	0.0219	0.0101	0.293	0.00311	9	0.85	1.2	0.015	10	0.35	87
JK-2	1	3	14.85	1.27	0.0154	0.0152	0.568	0.0082	0	0	0	0.002	25	0.75	74
JK-1	1	3	11.6	0.995	0.0105	0.00359	0.415	0.00609	0	0	0	0.002	35	0.85	74
ZT-2	1	3	10.2	0.844	0.00736	0.00394	0.354	0.00828	0	0	0	0	15	0.9	158
DT-2	1	3	16.6	1.4	0.012	0.00553	0.591	0.00486	0	0	0	0	6	0.85	73
YD-1	1	3	17.1	1.43	0.0178	0.00869	0.655	0.00952	6	0.7	1.5	0.05	40	0.95	88
QY-1	2	1	17.2	1.65	0.0135	0.00574	0.564	0.00811	15	0.75	0	0	40	0.85	72
WS-2	2	1	3.49	0.366	0.0158	0.00158	0.812	0.00425	9	0.3	2	0.04	150	0.95	116
SJ-1	2	2	14.4	1.35	0.015	0.00467	0.553	0.00802	0	0	0	0	15	0.95	67
DQ-2	2	3	23.6	2.09	0.00763	0.0107	0.316	0.0257	10	0.4	2	0.4	15	0.4	128
WS-1	2	3	16.5	1.23	0.00918	0.00761	0.476	0.00741	13	0.75	0	0	15	0.5	104
SK-1	2	3	17.2	1.54	0.0164	0.00429	0.644	0.0121	10	0.75	1.5	0.02	30	0.65	108
LJK-1	2	3	19.4	1.54	0.0121	0.00588	0.354	0.00302	11	0.85	0	0	15	0.3	84
SJ-2	3	1	15.6	1.25	0.0139	0.00914	0.743	0.0151	6	0.8	0	0	20	0.15	63
LS	3	1	13.9	1.22	0.0293	0.00446	0.484	0.00381	9	0.8	2	0.03	0.5	0.015	115
QY-2	3	2	16.3	1.26	0.0131	0.0187	0.545	0.00372	9	0.85	0	0	50	0.02	92
DQ-1	3	2	12	1.12	0.0308	0.0154	0.392	0.0262	10	0.45	2	0.15	10	0.6	134
YD-2	3	3	14.9	1.28	0.00914	0.00751	0.621	0.0101	0	0	0	0	30	0.9	89
SLT	3	3	10.8	0.883	0.00803	0.0081	0.347	0.00772	6	0.2	1.5	0.02	70	0.8	145
